# Supplementary material for: Highly dispersed CoP on three-dimensional ordered mesoporous FeP for efficient electrocatalytic hydrogen production
Source: Royal Society of Chemistry journal article supplement (doi:10.1039/d1ta06574b), 2021-01-01
Supplement: d1ta06574b1.pdf [file d1ta06574b1.pdf]

## Supplementary Information

# Highly dispersed CoP on three-dimensional ordered mesoporous FeP for efficient electrocatalytic hydrogen production

Yuchen Wu<sup>1,2</sup>, Yongjia Wang<sup>1</sup>, Zhiwei Wang<sup>1,2</sup> and Xiuting Li<sup>\*1</sup>

<sup>1</sup>*Institute for Advanced Study, Shenzhen University, Shenzhen 518060, China. Email: [xiuting.li@szu.edu.cn](mailto:xiuting.li@szu.edu.cn).*

<sup>2</sup>*Key Laboratory of Optoelectronic Devices and Systems, College of Physics and Optoelectronic Engineering, Shenzhen University, Shenzhen 518060, China.*

\*Correspondence and requests for materials should be addressed to X.L. (email: [xiuting.li@szu.edu.cn](mailto:xiuting.li@szu.edu.cn)).

## Table of Contents

|                                                                                                                                        |           |
|----------------------------------------------------------------------------------------------------------------------------------------|-----------|
| <b>Preparation and yield of the CoP@3DOM-FeP and the Bulk-Co(0.1)FeP.....</b>                                                          | <b>4</b>  |
| <b>Fig. S1</b> A typical SEM image of the Co-MOF embedded 3-dimensional ordered PS template. ....                                      | <b>3</b>  |
| <b>Fig. S2</b> A picture of the ceramic combustion boat and the Co(0.1)P@3DOM-FeP samples.....                                         | <b>4</b>  |
| <b>Fig. S3</b> Calibration curves of SCE vs RHE in 0.5M H <sub>2</sub> SO <sub>4</sub> , 1M PBS and 1M KOH electrolyte solution. ....  | <b>6</b>  |
| <b>Fig. S4</b> HRTEM images of FeP crystalline regions. ....                                                                           | <b>7</b>  |
| <b>Fig. S5</b> BET isotherm and pore distribution of Bulk-Co(0.1)P@FeP.....                                                            | <b>8</b>  |
| <b>Fig. S6</b> Cyclic voltammograms of a) Co(0.1)P@3DOM-FeP and b) Bulk-Co(0.1)FeP at the scan rates of 5~100 mV s <sup>-1</sup> ..... | <b>9</b>  |
| <b>Fig. S7</b> XPS survey spectra of Co(0.1)P@3DOM-FeP.....                                                                            | <b>10</b> |
| <b>Fig. S8</b> A typical SEM image of the Co(0.2)P@3DOM-FeP. ....                                                                      | <b>11</b> |
| <b>Fig. S9</b> Chronoamperometric i-t test of the Co(0.1)P@3DOM-FeP catalyst in alkaline and acidic media. ....                        | <b>12</b> |
| <b>Table S1</b> HER performance comparison of several up-to-date cobalt based electrocatalysts. ....                                   | <b>13</b> |

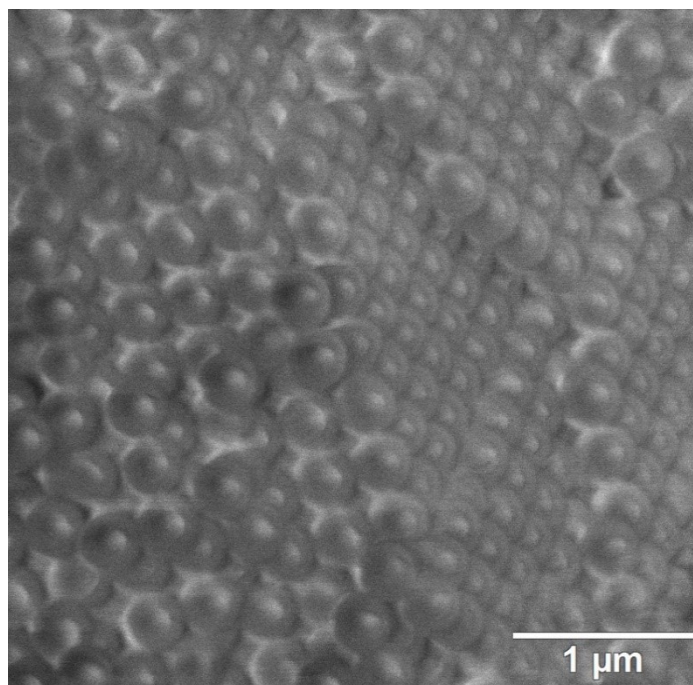

**Fig. S1** A typical SEM image of the Co-MOF embedded 3-dimensional ordered PS template.

## Preparation and yield of the CoP@3DOM-FeP and the Bulk-Co(0.1)FeP

For synthesizing the Co(0.1)P@3DOM-FeP, 2.0 g ferrous (II) acetate ( $\text{Fe(II)Ac}_2$ ,  $222.1 \text{ g mol}^{-1}$ ) and 0.1 g ZIF-67 ( $71.84 \text{ g mol}^{-1}$ ) were used. Assuming all the cobalt and iron formed ideal CoP and FeP, the theoretical mass of the final product should be 1.596 g. While the weight of the synthesised product in a single batch is around 1.1~1.3 g. Thus, the yield percentage is around 69%~82%. The main reasons for the loss include the inevitable residues in the combustion boat ( $20\text{mm}\times 20\text{mm}\times 40\text{mm}$ , Fig. S2), the transfer loss in each step of the synthesis and the influence of the gas flow in the annealing process. Clearly these types of loss can be greatly reduced if

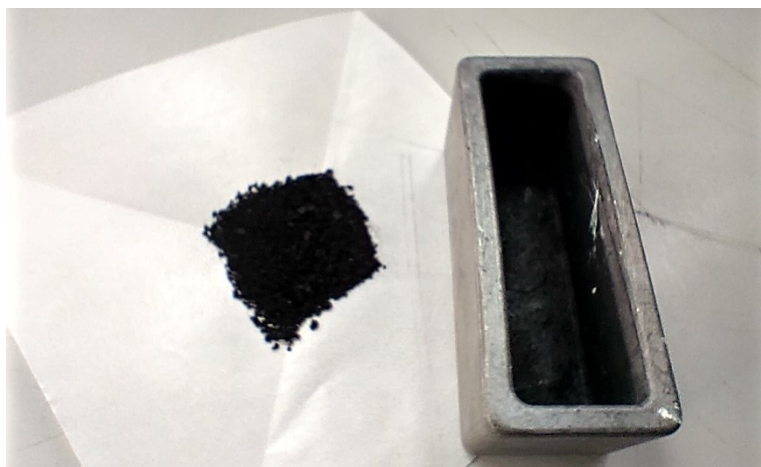

larger batch are considered in the future.

**Fig. S2** A picture of the ceramic combustion boat and the Co(0.1)P@3DOM-FeP samples.

For synthesizing the Bulk-Co(0.1)FeP, 2.0 g ferrous (II) acetate ( $\text{Fe(II)Ac}_2$ ) and 1.8 g (1 mM) cobalt nitrate hexahydrate ( $\text{Co(NO}_3)_2\cdot 6\text{H}_2\text{O}$ ) were dissolved in the mixed solution of 4 mL ethylene glycol (EG) and 0.1 mL acetate acid. The solution was

then kept vigorous stirring for 30 mins in a sealed vial to avoid oxidation. Next, without PS template added, the sample was dried in an oven for several hours until the ethanol evaporated, and the Fe-Co mixed metal salt was recrystallized. The mixed salt was washed and dried with ethanol for several times and then grinded into powders. The powders was calcinated in furnace tube and treated with the phosphide CVD with the same protocol for synthesizing the Co(0.1)P@3DOM-FeP. The yield of the synthesised Bulk-Co(0.1)FeP is 1.39 g, while the theoretical value (1.596 g) is the same with Co(0.1)P@3DOM-FeP. Thus, the yield rate for Bulk-Co(0.1)FeP is 87.0%.”

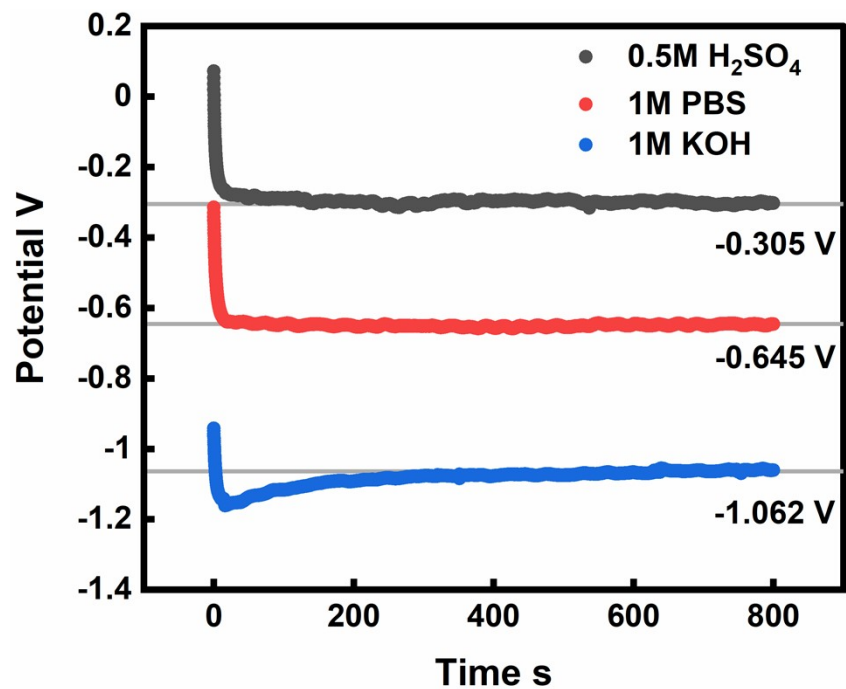

**Fig. S3** Calibration curves of SCE vs RHE in 0.5M H<sub>2</sub>SO<sub>4</sub>, 1M PBS and 1M KOH electrolyte solution.

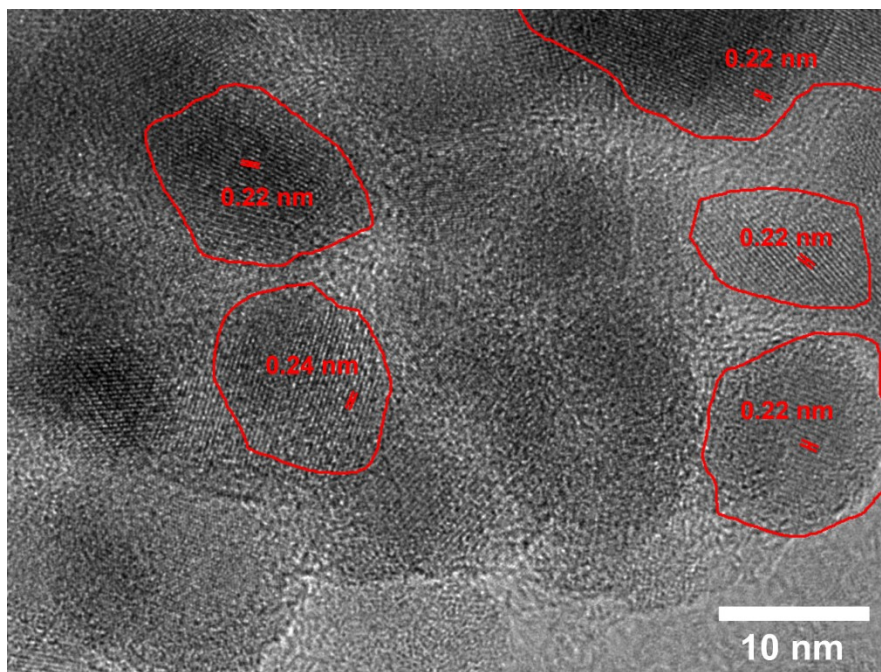

**Fig. S4** HRTEM images of FeP crystalline regions.

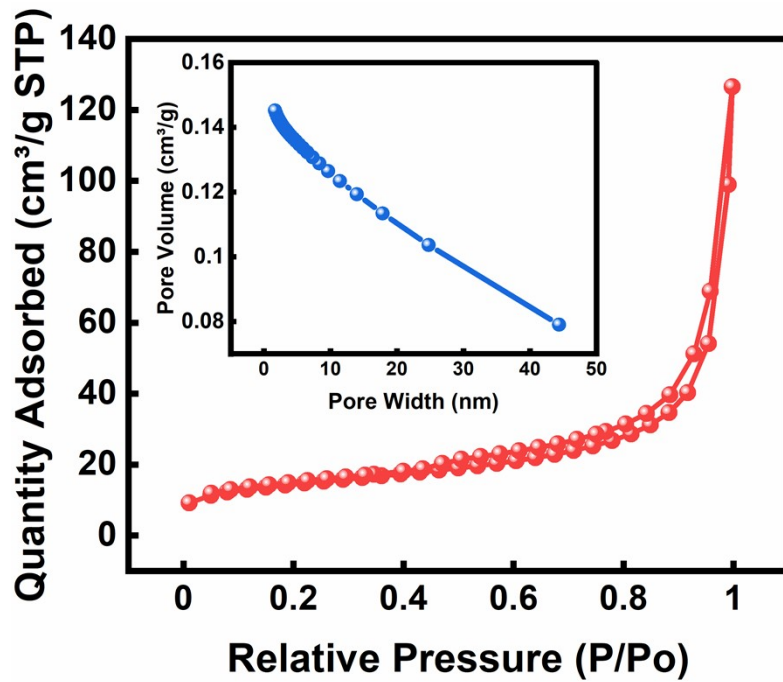

**Fig. S5** BET isotherm and pore distribution of Bulk-Co(0.1)P@FeP.



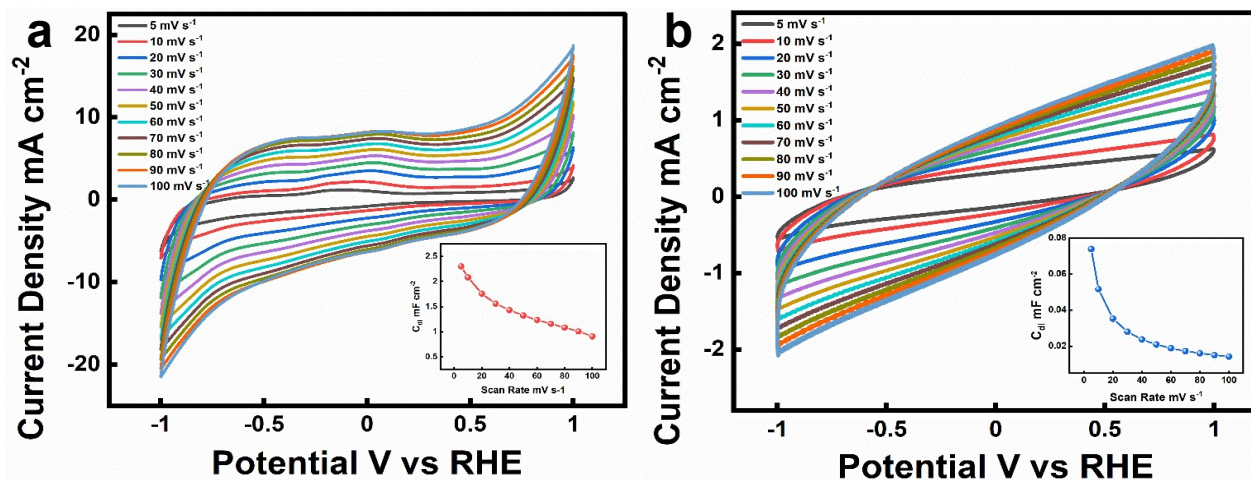

**Fig. S6** Cyclic voltammograms of a) Co(0.1)P@3DOM-FeP and b) Bulk-Co(0.1)FeP at the scan rates of 5~100 mV s<sup>-1</sup>.

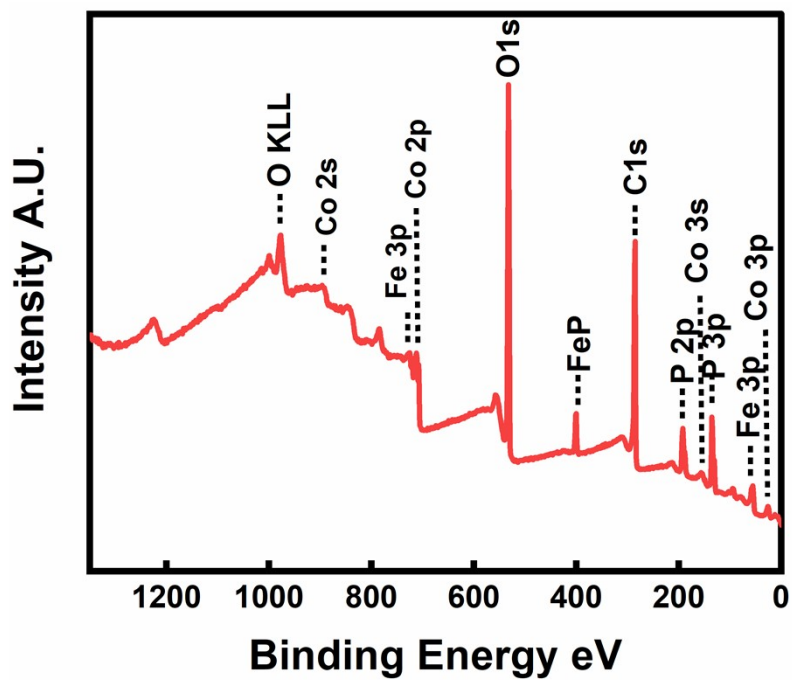

**Fig. S7** XPS survey spectra of Co(0.1)P@3DOM-FeP.

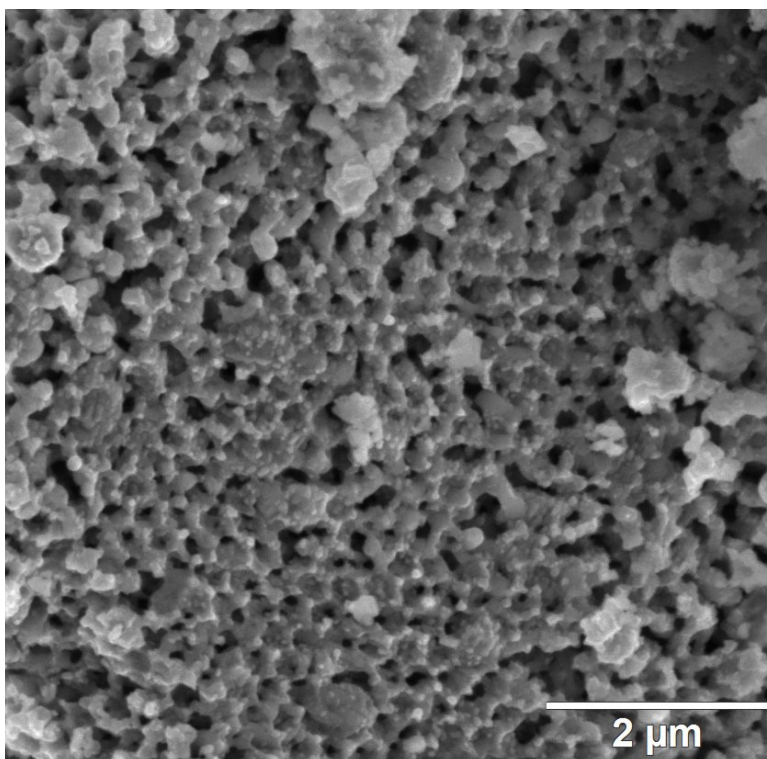

**Fig. S8** A typical SEM image of the Co(0.2)P@3DOM-FeP.

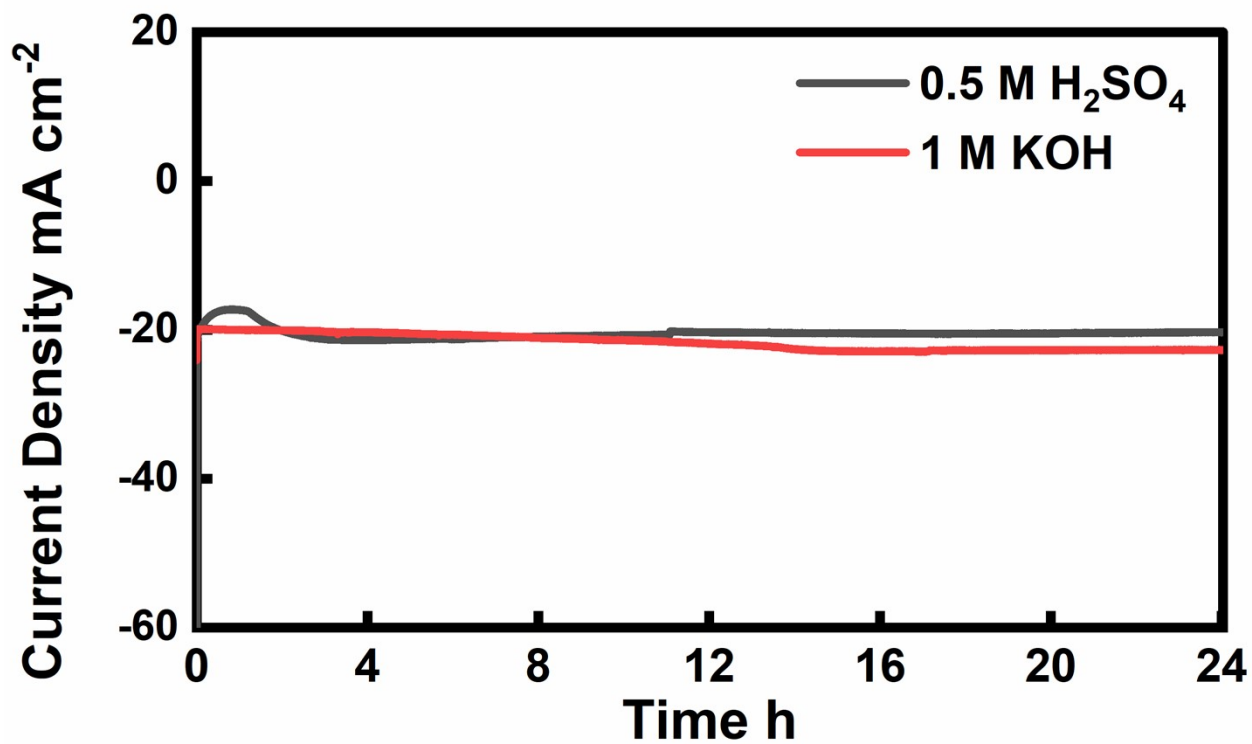

**Fig. S9** Chronoamperometric *i-t* test of the Co(0.1)P@3DOM-FeP catalyst with constant overpotentials of 107 mV and 135 mV applied in alkaline and acidic media respectively.

**Table S1** HER performance comparison of several up-to-date cobalt based electrocatalysts.

| Electrocatalyst                                                   | Electrolyte  | Overpotential<br>mV (@10mA cm <sup>-2</sup> ) | Tafel Slop<br>mV dec <sup>-1</sup> | References |
|-------------------------------------------------------------------|--------------|-----------------------------------------------|------------------------------------|------------|
| Pt/C                                                              | Universal PH | 53.7~64.5                                     | 36.2~46.5                          | This work  |
| CoP@3DOM-FeP                                                      | Universal PH | 67.2~76.5                                     | 66.3~77.5                          | This work  |
| N-CoP/ CC                                                         | Universal PH | 25~74                                         | 49~69                              | 1          |
| Cu-CoP NRAs/CC                                                    | Universal PH | 44~137                                        | 86~144                             | 2          |
| W-CoP NAs/CC                                                      | Universal PH | 89~102                                        | 58~87                              | 3          |
| V-CPNA/CC                                                         | Universal PH | 87~98                                         | 65.4~83.7                          | 4          |
| CoS <sub>1.097</sub> /MoS <sub>2</sub>                            | Universal PH | 228~341                                       | 59~85                              | 5          |
| CoP NFs                                                           | Universal PH | 122~136                                       | 54.8~56.2                          | 6          |
| Mn-Co-P/Ti                                                        | Universal PH | 49~86                                         | 55~82                              | 7          |
| Ni <sub>0.89</sub> Co <sub>0.11</sub> Se <sub>2</sub> MNSN/<br>NF | Universal PH | 52~85                                         | 39~78                              | 8          |
| CoP/Co-MOF                                                        | Universal PH | 27~49                                         | 43~63                              | 9          |
| CoP@3D-NPC                                                        | Universal PH | 127~333                                       | 58~71                              | 10         |
| CoP@NG                                                            | Universal PH | 158~182                                       | 59.6~63.8                          | 11         |
| CoP/NF                                                            | Universal PH | 41.1~83.9                                     | 55~65.3                            | 12         |
| CoP/Mo <sub>2</sub> C-NC                                          | Universal PH | 68~81.8                                       | 49~68                              | 13         |
| CoP/CoMoP                                                         | Alkaline     | 34                                            | 33                                 | 14         |
| CoP@NC-350                                                        | Alkaline     | 75                                            | 55                                 | 15         |
| CoPS/N-C                                                          | Alkaline     | 148                                           | 78                                 | 16         |
| CoMoCH@NiCoP/NF                                                   | Alkaline     | 45                                            | 63                                 | 17         |
| CoP/PNC                                                           | Alkaline     | 165                                           | 70                                 | 18         |
| Mo-CoP                                                            | Alkaline     | 118                                           | 69                                 | 19         |
| Bi/CoP                                                            | Alkaline     | 122                                           | 60.2                               | 20         |
| NiCoP-8.0                                                         | Alkaline     | 34.3                                          | 49.9                               | 21         |

|                                          |          |     |       |    |
|------------------------------------------|----------|-----|-------|----|
| Amorphous CoP/NF                         | Alkaline | 143 | 63    | 22 |
| CoFeO@BP                                 | Alkaline | 88  | 51    | 23 |
| CeO <sub>2</sub> /Co <sub>4</sub> N      | Alkaline | 30  | 66    | 24 |
| Mn <sub>3</sub> O <sub>4</sub> /CoP PNRs | Alkaline | 43  | 28.9  | 25 |
| N-CNTs@Co <sub>4</sub> N@NF              | Alkaline | 67  | 46.5  | 26 |
| O,Mo-CoP/NF-2                            | Alkaline | 59  | 65.4  | 27 |
| HP-CoP NA/NF                             | Alkaline | 70  | 83.2  | 28 |
| Co <sub>0.2</sub> -VOOH                  | Alkaline | 130 | 58.2  | 29 |
| CoP/SPNF                                 | Alkaline | 45  | 65.9  | 30 |
| Cu <sub>3</sub> P-CoP/CC                 | Acidic   | 59  | 58    | 31 |
| CoP/rGO-400                              | Acidic   | 105 | 50    | 32 |
| Ni <sub>2</sub> P-CoP                    | Acidic   | 105 | 64    | 33 |
| CoP <sub>2</sub> /CC                     | Acidic   | 72  | 67    | 34 |
| NiCoP                                    | Acidic   | 160 | 70    | 35 |
| NiCoP/MoxC-15                            | Acidic   | 116 | 57.4  | 36 |
| Co-MoS <sub>2</sub> -0.5                 | Acidic   | 60  | 64.72 | 37 |
| Fe-Co <sub>2</sub> P/ NCNTs              | Acidic   | 104 | 68    | 38 |
| CoP-N-C-400                              | Acidic   | 31  | 42    | 39 |
| MoS <sub>2</sub> @CoS <sub>2</sub>       | Acidic   | 96  | 60    | 40 |

---

## References

1. Men, Y.; Li, P.; Yang, F.; Cheng, G.; Chen, S.; Luo, W., *Applied Catalysis B: Environmental* **2019**, 253, 21-27.
2. Wen, L.; Sun, Y.; Zhang, C.; Yu, J.; Li, X.; Lyu, X.; Cai, W.; Li, Y., *ACS Applied Energy Materials* **2018**, 1 (8), 3835-3842.
3. Wang, X.; Chen, Y.; Yu, B.; Wang, Z.; Wang, H.; Sun, B.; Li, W.; Yang, D.; Zhang, W., *Small* **2019**, 15 (37), 1902613.
4. Wang, X.; Chen, Y.; He, J.; Yu, B.; Wang, B.; Zhang, X.; Li, W.; Ramadoss, M.; Zhang, W.; Yang, D., *ACS Applied Energy Materials* **2020**, 3 (1), 1027-1035.
5. Sun, J.; Huang, Z.; Huang, T.; Wang, X.; Wang, X.; Yu, P.; Zong, C.; Dai, F.; Sun, D., *ACS Applied Energy Materials* **2019**, 2 (10), 7504-7511.
6. Ji, L.; Wang, J.; Teng, X.; Meyer, T. J.; Chen, Z., *ACS Catalysis* **2020**, 10 (1), 412-419.
7. Liu, T.; Ma, X.; Liu, D.; Hao, S.; Du, G.; Ma, Y.; Asiri, A. M.; Sun, X.; Chen, L., *ACS Catalysis* **2017**, 7 (1), 98-102.
8. Liu, B.; Zhao, Y.-F.; Peng, H.-Q.; Zhang, Z.-Y.; Sit, C.-K.; Yuen, M.-F.; Zhang, T.-R.; Lee, C.-S.; Zhang, W.-J., *Advanced Materials* **2017**, 29 (19), 1606521.
9. Liu, T.; Li, P.; Yao, N.; Cheng, G.; Chen, S.; Luo, W.; Yin, Y., *Angewandte Chemie International Edition* **2019**, 58 (14), 4679-4684.
10. Yang, S.; Chen, L.; Wei, W.; Lv, X.; Xie, J., *Applied Surface Science* **2019**, 476, 749-756.
11. Lu, Y.; Hou, W.; Yang, D.; Chen, Y., *Electrochimica Acta* **2019**, 307, 543-552.
12. Liu, J.; Gao, Y.; Tang, X.; Zhan, K.; Zhao, B.; Xia, B. Y.; Yan, Y., *Journal of Materials Chemistry A* **2020**, 8 (37), 19254-19261.
13. Luo, X.; Zhou, Q.; Du, S.; Li, J.; Zhang, L.; Lin, K.; Li, H.; Chen, B.; Wu, T.; Chen, D.; Chang, M.; Liu, Y., *ACS Applied Materials & Interfaces* **2018**, 10 (49), 42335-42347.
14. Huang, X.; Xu, X.; Luan, X.; Cheng, D., *Nano Energy* **2020**, 68, 104332.
15. Li, Z.; Sui, J.; Zhang, Q.; Yu, J.; Yu, L.; Dong, L., *International Journal of Hydrogen Energy* **2021**, 46 (2), 2095-2102.
16. Li, Y.; Niu, S.; Rakov, D.; Wang, Y.; Cabán-Acevedo, M.; Zheng, S.; Song, B.; Xu, P., *Nanoscale* **2018**, 10 (15), 7291-7297.

17. Guo, D.; Chen, H.; Tian, H.; Ouyang, S.; Wang, J.; Lv, J., *Chemical Communications* **2020**, 56 (37), 4990-4993.
18. Peng, Z.; Yu, Y.; Jiang, D.; Wu, Y.; Xia, B. Y.; Dong, Z., *Carbon* **2019**, 144, 464-471.
19. Li, L.; Guo, Y.; Wang, X.; Liu, X.; Lu, Y., *Langmuir* **2021**, 37 (19), 5986-5992.
20. Guo, L.; Bai, X.; Xue, H.; Sun, J.; Song, T.; Zhang, S.; Qin, L.; Huang, K.; He, F.; Wang, Q., *Chemical Communications* **2020**, 56 (56), 7702-7705.
21. Lv, X.; Li, X.; Yang, C.; Ding, X.; Zhang, Y.; Zheng, Y.-Z.; Li, S.; Sun, X.; Tao, X., *Advanced Functional Materials* **2020**, 30 (16), 1910830.
22. Beltrán-Suito, R.; Menezes, P. W.; Driess, M., *Journal of Materials Chemistry A* **2019**, 7 (26), 15749-15756.
23. Li, X.; Xiao, L.; Zhou, L.; Xu, Q.; Weng, J.; Xu, J.; Liu, B., *Angewandte Chemie International Edition* **2020**, 59 (47), 21106-21113.
24. Yao, N.; Meng, R.; Wu, F.; Fan, Z.; Cheng, G.; Luo, W., *Applied Catalysis B: Environmental* **2020**, 277, 119282.
25. Dong, R.; Zhu, A.; Zeng, W.; Qiao, L.; Lu, L.; Liu, Y.; Tan, P.; Pan, J., *Applied Surface Science* **2021**, 544, 148860.
26. Jiao, M.; Wang, Z.; Chen, Z.; Zhang, X.; Mou, K.; Zhang, W.; Liu, L., *ChemElectroChem* **2020**, 7 (9), 2065-2072.
27. Mu, J.; Xu, J.; Zhou, C.; Wang, Q.; Wang, X.-G.; Liu, Z.-Y.; Zhao, X.-J.; Yang, E.-C., *ChemElectroChem* **2021**, 8 (1), 103-111.
28. Wang, H.; Li, Y.; Wang, R.; He, B.; Gong, Y., *Electrochimica Acta* **2018**, 284, 504-512.
29. Tao, B. X.; Li, X. L.; Ye, C.; Zhang, Q.; Deng, Y. H.; Han, L.; Li, L. J.; Luo, H. Q.; Li, N. B., *Nanoscale* **2019**, 11 (39), 18238-18245.
30. Cao, S.; You, N.; Wei, L.; Huang, C.; Fan, X.; Shi, K.; Yang, Z.; Zhang, W., *Inorganic Chemistry* **2020**, 59 (12), 8522-8531.
31. Du, H.; Zhang, X.; Tan, Q.; Kong, R.; Qu, F., *Chemical Communications* **2017**, 53 (88), 12012-12015.
32. Jiao, L.; Zhou, Y.-X.; Jiang, H.-L., *Chemical Science* **2016**, 7 (3), 1690-1695.
33. Liang, X.; Zheng, B.; Chen, L.; Zhang, J.; Zhuang, Z.; Chen, B., *ACS Applied Materials & Interfaces* **2017**, 9 (27), 23222-23229.



34. Zhou, Y.; Yang, Y.; Wang, R.; Wang, X.; Zhang, X.; Qiang, L.; Wang, W.; Wang, Q.; Hu, Z., *Journal of Materials Chemistry A* **2018**, 6 (39), 19038-19046.
35. Das, J. K.; Samantara, A. K.; Satyarthi, S.; Rout, C. S.; Behera, J. N., *RSC Advances* **2020**, 10 (8), 4650-4656.
36. Wang, Y.; Wang, B.; Chu, W.; Kong, Y.; Wu, Q.; Liu, Z., *International Journal of Hydrogen Energy* **2020**.
37. Xiong, Q.; Zhang, X.; Wang, H.; Liu, G.; Wang, G.; Zhang, H.; Zhao, H., *Chemical Communications* **2018**, 54 (31), 3859-3862.
38. Pan, Y.; Liu, Y.; Lin, Y.; Liu, C., *ACS Applied Materials & Interfaces* **2016**, 8 (22), 13890-13901.
39. Zhang, Z.; Hao, J.; Yang, W.; Tang, J., *ChemCatChem* **2015**, 7 (13), 1920-1925.
40. He, S.; Du, H.; Wang, K.; Liu, Q.; Sun, J.; Liu, Y.; Du, Z.; Xie, L.; Ai, W.; Huang, W., *Chemical Communications* **2020**, 56 (41), 5548-5551.
